# Supplementary material for: New observations confirm the progressive acidification in the Mozambique Channel
Source: Copernicus journal article supplement (doi:10.5194/egusphere-2025-3469), 2025-07-29

1 Supplementary Material

2 **Title: New observations confirm the progressive acidification in the Mozambique Channel**

3

4 Nicolas Metz<sup>1</sup>, Claire Lo Monaco<sup>1</sup>, Aline Tribollet<sup>1</sup>, Jean-François Ternon<sup>2</sup>, Frédéric Chevallier<sup>3</sup>,  
5 Marion Gehlen<sup>3</sup>

6

7 1 Laboratoire LOCEAN/IPSL, Sorbonne Université-CNRS-IRD-MNHN, Paris, 75005, France

8 2 MARBEC, Université de Montpellier, CNRS, Ifremer, IRD, 34203 Sète, France

9 3 Laboratoire LSCE/IPSL, CEA-CNRS-UVSQ, Université Paris-Saclay Gif-sur-Yvette, 91191, France

10

11

12 This document includes Figures S1-S6 providing the supplementary information that supports part of  
13 the discussion presented in the main article.

14

15  
 16  
 17  
 18  
 19  
 20  
 21  
 22  
 23  
 24  
 25  
 26  
 27  
 28  
 29  
 30  
 31  
 32  
 33  
 34  
 35  
 36  
 37  
 38  
 39  
 40  
 41  
 42  
 43  
 44  
 45  
 46  
 47  
 48  
 49  
 50  
 51  
 52  
 53  
 54  
 55  
 56  
 57  
 58  
 59  
 60  
 61

Figure S1: Profiles of  $N-C_T$  (filled circles, line),  $C_{ant}$  (open circles, dashed) and density (Sigma-0) at the station occupied in June 1995 (blue) and in December 2003 (red) (GLODAP station 591 at 42°E/24.7°S). In June,  $N-C_T$  and  $C_{ant}$  concentrations are homogeneous in the deep mixed-layer (0-70m). In surface,  $N-C_T$  in June and December are very close, coherent with the seasonal cycle (Figure 4). Note that the same  $C_{ant}$  concentrations (40  $\mu\text{mol/kg}$ ) were evaluated below 100m in 1995 and 2003 whereas in surface  $C_{ant}$  values in December are unrealistic.

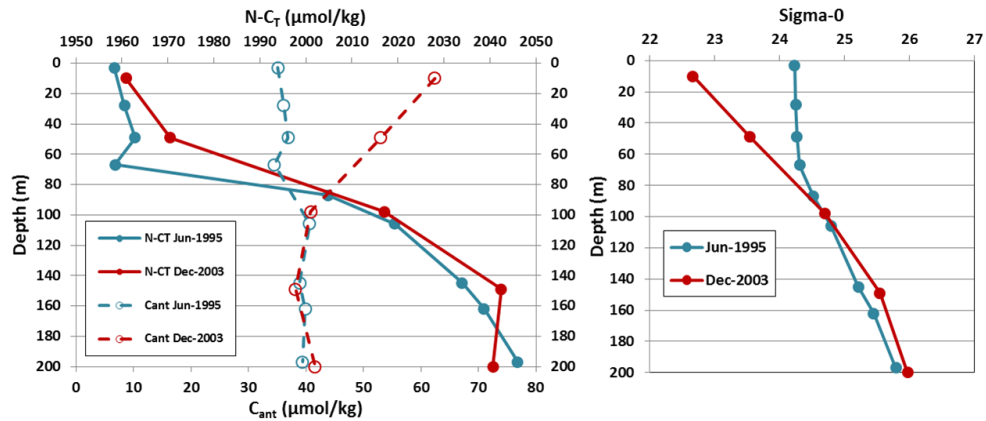

Figure S2: Seasonal cycle of  $f\text{CO}_2$  (black),  $f\text{CO}_2$  normalized at temperature 27°C (red) and  $C_T$  (grey) in the southern Mozambique Channel (24-30°S) derived from the monthly climatology (reference year 2010, Fay et al, 2024).

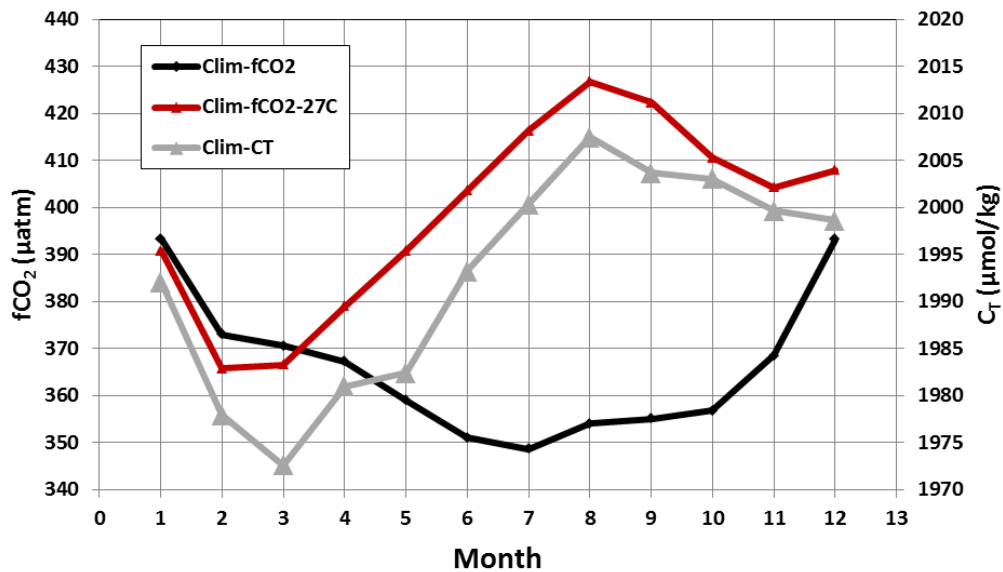

62 Figure S3: Time-series of air-sea CO<sub>2</sub> flux (black, negative for ocean sink) and C<sub>T</sub> concentration (grey  
 63 and 12-month running mean in red) averaged in the southern Mozambique Channel (24-30°S) based  
 64 on the FFNN-LSCE model over 2015-2023. When the sink is stronger (e.g. in 2020) the C<sub>T</sub> increase is  
 65 faster.

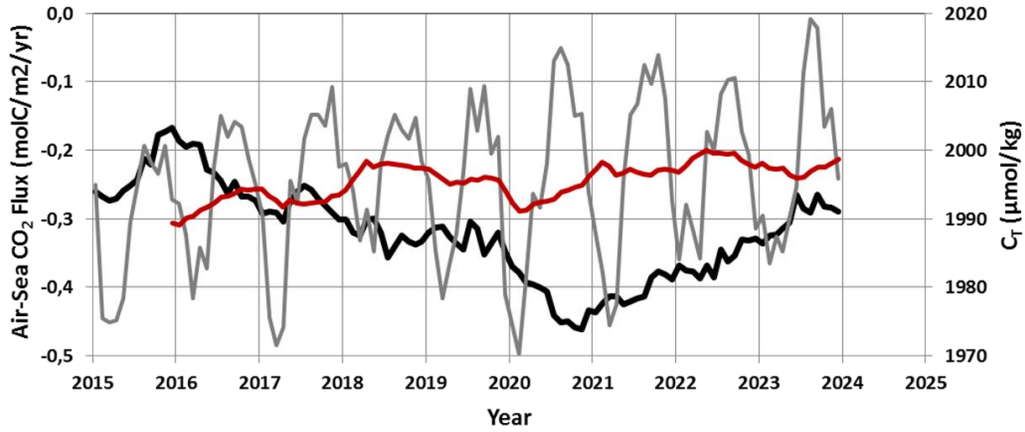

80

81 Figure S4: Time-series of oceanic fCO<sub>2</sub> versus atmospheric CO<sub>2</sub> in the southern Mozambique Channel  
 82 (24-30°S) based on averaged observations between 1963 and 2022 (circles) and the FFNN model over  
 83 1985-2023 (grey diamonds, dashed grey line). Available observations are shown for all seasons but  
 84 the trend of +1.089 µatm/ppm (red dashed line) evaluated using only April-May data (red circles).

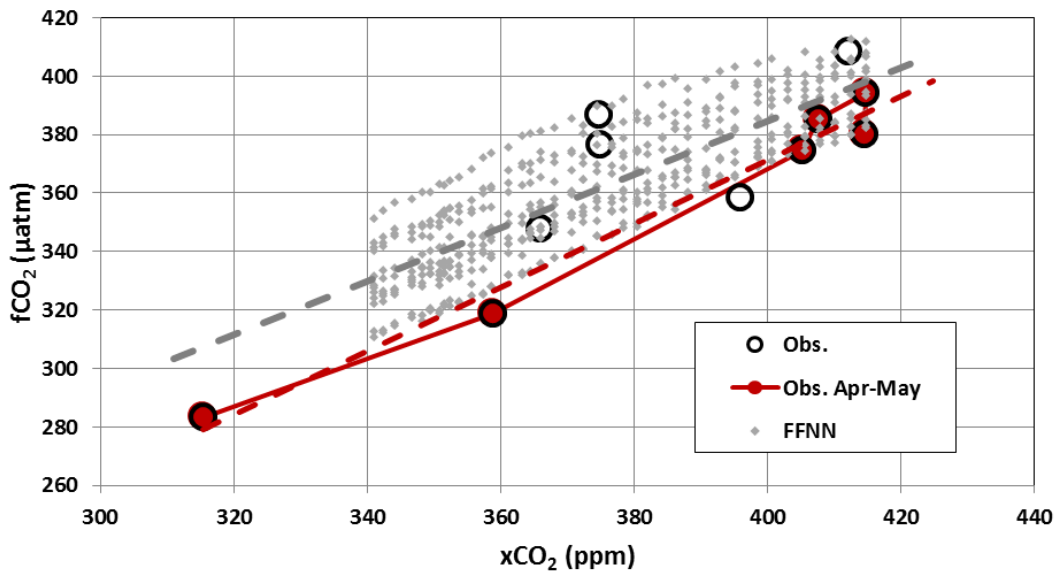

100  
 101  
 102  
 103  
 104  
 105  
 106  
 107  
 108  
 109

110 Figure S5: Map of  $\Omega_{ar}$  in September 2023 in the Mozambique Channel based on the FFNN model.  
111 South of 20°S,  $\Omega_{ar} < 3.3$ . Figure produced with ODV (Schlitzer, 2018).  
112  
113

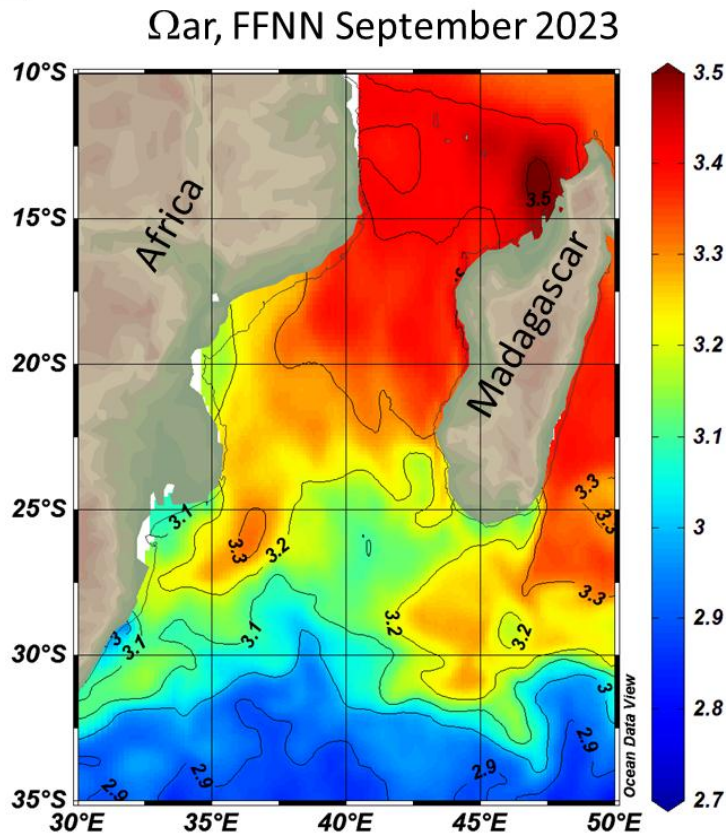

162  
163 Figure S6: Top: Time-series of weekly SST in the Mozambique Channel, at 23°S/40E over 2019-2025.  
164 In January 2025 SST reaches 31°C (data from <https://data.marine.copernicus.eu/product/>, Multi  
165 Observation Global Ocean ARMOR3D L4 MULTIOBS\_GLO\_PHY\_TSUV\_3D\_MYNRT\_015\_012). Last  
166 access 12/5/2025. Bottom: Map of Marine Heat Wave category for January 5<sup>th</sup> 2025 In the Indian  
167 Ocean. The location of the BGC-Argo float in the southern Mozambique Channel is indicated by  
168 orange circle.

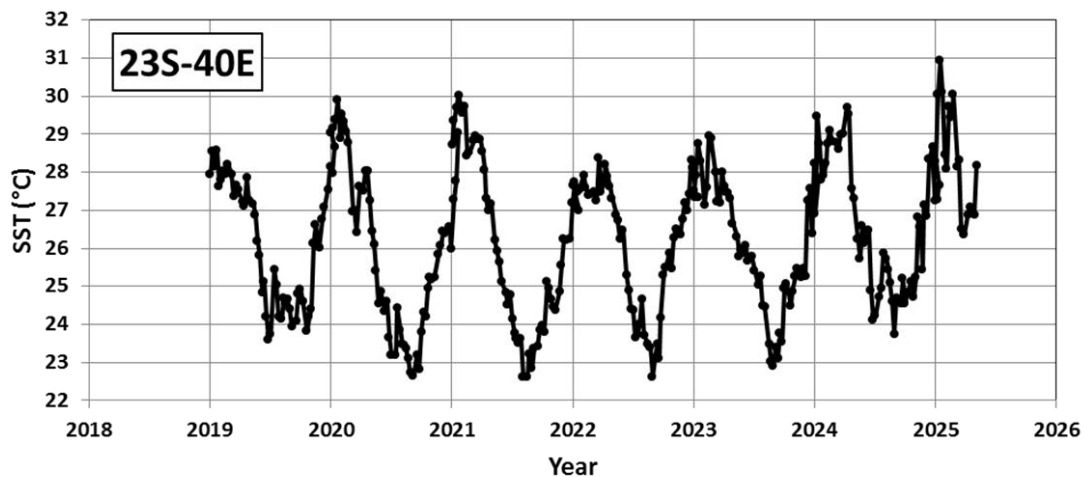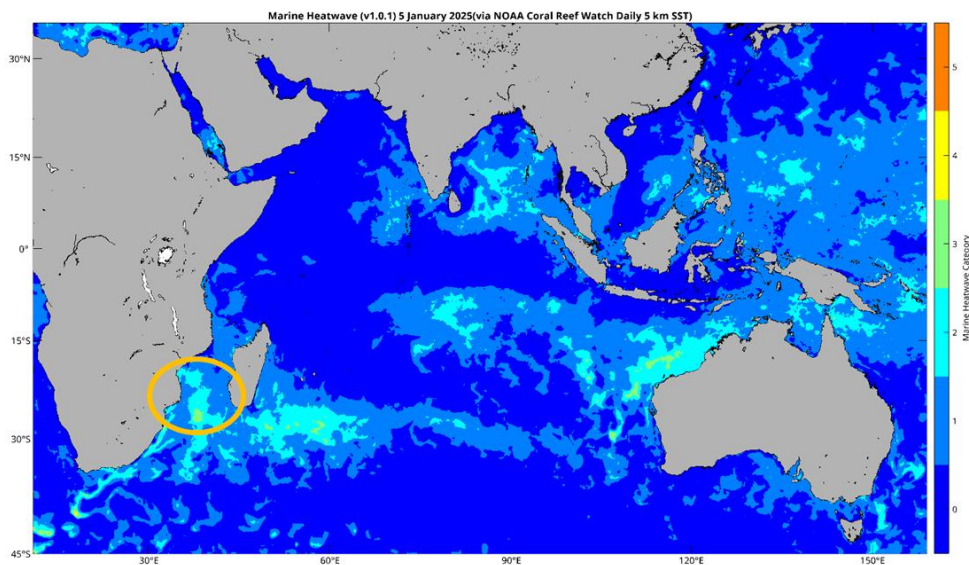

Supplement: Supplementary file 1 [file egusphere-2025-3469-supplement.pdf]
